# Supplementary material for: Planar cell polarity coordination in a cnidarian embryo provides clues to animal body axis evolution
Source: eLife. 2025 Jul 2;14:RP104508. doi: 10.7554/eLife.104508 (PMC12221298; doi:10.7554/eLife.104508)
Supplement: Supplementary file 1. [file elife-104508-supp1.xlsx]

## Sheet: Sheet1
Phylum	Class	Species	Availability of whole genome assembly						PCP (core PCP, Ft/Ds)
				Wnt/β-catenin
				β-catenin	Axin	GSK3	TCF	Wnt	Frizzled/Fzd	Dshevelled/Dvl	Flamingo/Celsr	Strabismus/Vangl	Inversin/Diego	Prickle (Testin)	Fat/Fat-like	Dachsous	Source
Amoeba		Dictyostelium	Yes	± (a,15)	Absent	L34674 (16)	Absent	Absent	Absent	Absent	Absent	Absent	Absent	Absent	Absent	Absent	Ensemble Protists
Fungi		Allomyces macrogynus	Yes	± KNE54313	Absent	KNE66930	Absent	Absent	Absent	Absent	Absent	Absent	Absent	Absent	Absent	Absent	Ensemble Fungi
Filasterea		Capsaspora owczarzaki	Yes	Absent	Absent	KJE89342	Absent	Absent	Absent	Absent	Absent	Absent	Absent	Absent	Absent	Absent	Ensemble Protists
Choanoflagellate		Salpingoeca rosetta	Yes	± XM_004991040 (d)	Not found	XM_004990934	± XM_004997546 (b)	Not found	Not found	Not found	Absent (1)	Absent (1)	XM_004991658 (1, 10)	XM_004988894 (e, 1, 10)	Not found		Genbank
		Monosiga brevicollis	Yes	Not found	Not found	XM_001745535	± XM_001749981 (c)	Absent (9)	Absent (9)	Not found	Absent (17)	Absent (17)	XM_001746371 (1, 10)	XM_001742763 (e, 1, 10)	± XM_001750799 (f, 17)		Genbank
Ctenophora		Mnemiopsis leidyi	Yes	ML073715a(HM448817) (8)	Absent (8)	ML20837a (8)	ML11223a(HM448822) (8)	ML01051a (HM448816), ML101013a (HM448815), ML06021a (HM448814), ML07528a (HM448813) (8)	ML003224a (HM448819), ML034649b (HM448820) (8)	ML005358a(HM448818) (8)	Absent (1)	Absent (1)	Absent (1)	ML34571a(ML2189) (e, 1)	Not found		Ensemble Metazoa
Porifera	Homosclero-morpha	Oscarella carmela	Yes	EB741523	comp23540_c0_seq2 (6)	comp23762_c0_seq1, comp23762_c0_seq3	comp28653_c0_seq3	comp8600_c0_seq1, comp49400_c0_seq1, comp36292_c0_seq12, comp30539_c0_seq3, comp36292_c0_seq5, comp24555_c0_seq2, comp24555_c0_seq1, comp15540_c0_seq2, comp27463_c0_seq2, comp28793_c0_seq3, comp27694_c0_seq2, comp35766_c0_seq3, comp15540_c0_seq1, comp27694_c0_seq5 (6)	AJE25507-AJE25509 (6)	comp44599_c0_seq1 (6)	comp27089_c0_seq1 (1)	comp31109_c0_seq5 (1)	comp36587_c0_seq1, comp33916_c0_seq2 (1)	comp26691_c0_seq1 (e, 1)	± f (1, 17)		Compagen Genbank
		Oscarella lobularis	No	GQ144649	Not found	GQ144648 (5)	Not found	GQ144646, GQ144647 (5)	KM365029, KM365030, KM365031	KT898949	KT898950 (1)	KT898956 (1)	KT898953-KT898954 (1)	KT898955 (e, 1)			Genbank
	Calcerea	Sycon ciliatum		HG973379, HG973380.(7)	Absent? (7)	XM_065342136 (7)	HG973377, HG973378 (7)	HG973349–HG973369 (7)	HG973371-HG973373 (7)	HG973375, HG973376 (7)	XM_065327807 (1)	Absent (1)	XM_065335470 (1)	XM_065330858 (e, 1)			Genbank
	Demospongiae	Amphimedon queenslandica	Yes	NM_001279305.1 (3, 4)	XM_019993695.1 (3)	NM_001279283 (3, 4)	HM561507.1 (3, 4)	GQ144651 ABX90060 GQ144650 (3, 4)	NP_001266206, NP_001266202 (3)	NP_001266242 (3, 4)	Absent (1)	Absent (1)	Aqu1.221107, Aqu1.227557 (1)	Aqu1.217773 (e, 1)	XM_011408514 (14, 17)		Genbank
	Hexactinellida	Aphrocallistes vastus	Yes	comp17679_c0_seq1 (2)	comp13763_c0_seq1 (2)	comp17686_c0_seq3 (2)	comp24352_c0_seq1 (2)	Absent (2)	comp96115_c0_seq1 (2)	Absent (2)	Absent (1)	Absent (1)	comp15586_c0_seq1, comp34481_c0_seq1 (1)	comp27734_c0_seq1 (e, 1)			Compagen
Cnidaria	Anthozoa	Nematostella vectensis	Yes	XM_001647467	XM_048720266	XM_001628384	DQ497247	XP_001641494, XP_001633773, XP_001635899, XP_001623100, XP_001630693, XP_001629451, XP_001630717, XP_001630717, XP_001630032, XP_001637576, XP_001629450, XP_001629964, XP_001632885, XP_001637670	XM_001647490, XM_032379260, XM_048734489	XM_032380552	XM_032365472 (1)	XM_001630370 (1)	XM_032362457 (1)	XM_032367105 (e, 1)	XM_032383036 (Fat1), XM_048724363.1 (Fat4) (12)	XM_048733391 (12)	Genbank
	Hydrozoa	Clytia hemisphaerica	Yes	XLOC_003560 (JQ438997)	XLOC_011804	XLOC_016339 (EU374723)	XLOC_007658 (JQ806376)	XLOC_15404, XLOC_15382,	XLOC_044260 (DQ869571)	XLOC_015396 (JQ439000)	XLOC_001639 (JQ439002) (1)	XLOC_013328 (JQ439008) (1)	XLOC_037832 (JQ438998) (1)	XLOC_010268 (JQ439007)	XLOC_033731 (partial JQ439001) (g, 12)	XLOC_037142 (JQ438999) (12)	Marimba (Genbank)
								XLOC_31686,	XLOC_039886 (JQ439004)
								XLOC_01931,	XLOC_010791 (DQ869572)
								XLOC_41060,	XLOC_002646 (JQ439005)
								XLOC_00650, XLOC_30003,
								XLOC_35748,
								XLOC_34538,
								XLOC_45775,
								XLOC_02938,
								XLOC_06909,
		Hydra vlugaris	Yes	U38624 (11)	XM_002155907 (11)	NM_001309721 (11)	NM_001309733 (11)	AB426122, AB426123, MH940211, AB425832, AB426121, AB426120, AB425835, AB425836, AB426119, AB425834, AB425833 (11)	NM_001309725, NM_001280959, XM_002163078 (11)	NM_001287794 (11)	XM_047290573 (1)	XM_047273357 (1)	XM_012701755 (1)	XM_047270537 (1)	XM_012702814 (g, 12)	XM_047270896 (12)	Genbank
Placozoa		Tricoplax adherans	Yes	XM_002110267	XM_002109742	XM_002111683	XM_002116135 (partial)	XM_002116071, XM_002108187	AJE25511, AJE25512	No accession	XM_002118173 (1)	XM_002107607 (1)	Absent (1)	XM_002112366 (1)	XM_002116901 (13)	XM_002112915 (13)	Genbank
1 Schenkelaars et al., (2016) https://doi.org/10.1186/s12862-016-0641-0
2 Schenkelaars et al., (2017) https://doi.org/10.1038/s41598-017-15557-5
3 Adamska et al., (2010) https://doi.org/10.1111/j.1525-142X.2010.00435.x
4 Windsor Reid et al., (2018) https://doi.org/10.1186/s12862-018-1118-0
5 Lapébie et al., (2009) https://doi.org/10.1371/journal.pone.0005823
6 Nichols et al., (2006) https://doi.org/10.1073/pnas.0604065103
7 Leininger et al., (2014) https://doi.org/10.1038/ncomms4905
8 Pang et al., (2010) https://doi.org/10.1186/2041-9139-1-10
9 King et al., (2008) https://doi.org/10.1038/nature06617
10 Lapébie et al., (2011) https://doi.org/10.1002/bies.201100023
11 Srivastava et al., (2008) https://doi.org/10.1038/nature07191
12 Brooun et al., (2020) https://doi.org/10.1073/pnas.1917570117
13 Hulpiau and van Roy (2011) https://doi.org/10.1093/molbev/msq233
14 Abedin and King (2008) https://doi.org/10.1126/science.1151084
15 Grimson et al., (2000) https://doi.org/10.1038/35047099
a: β-catenin in Dictyostelium is β-catenin-like aardvark, which is a component of the junctional complex and involved in cell signalling (not mediated by GSK3).
b: TCF-like in choanoflagellate has HMG domain but not TCF orthologue.
c: Dsh-like gene in choanoflagellida is a PDZ domain-containing protein lacking DEP/DIX domains.
d: β catenin-like Armagiro repeat-containing proteins.
e: Prickle in Ctenophoores//Spongs are Prickle-Testin common ancestor. Choanoflagelleate has Testin orthologue but not Prickle
f: Monosiga and Amphimedon lefftyrin cadherins share EGF and lamG domains with FAT cadherins, but their location (N-terminal) is different (adjacent to the transmembrane domain)
g: Clytia and Hydra have Fat1 (Fat-like) but not Fat (Fat4)
